# Supplementary material for: Proteo-Molecular Investigation of Cultivated Rice, Wild Rice, and Barley Provides Clues of Defense Responses against Rhizoctonia solani Infection
Source: MDPI journal article supplement (doi:10.3390/bioengineering9100589), 2022-10-20
Supplement: s1 [file s1]

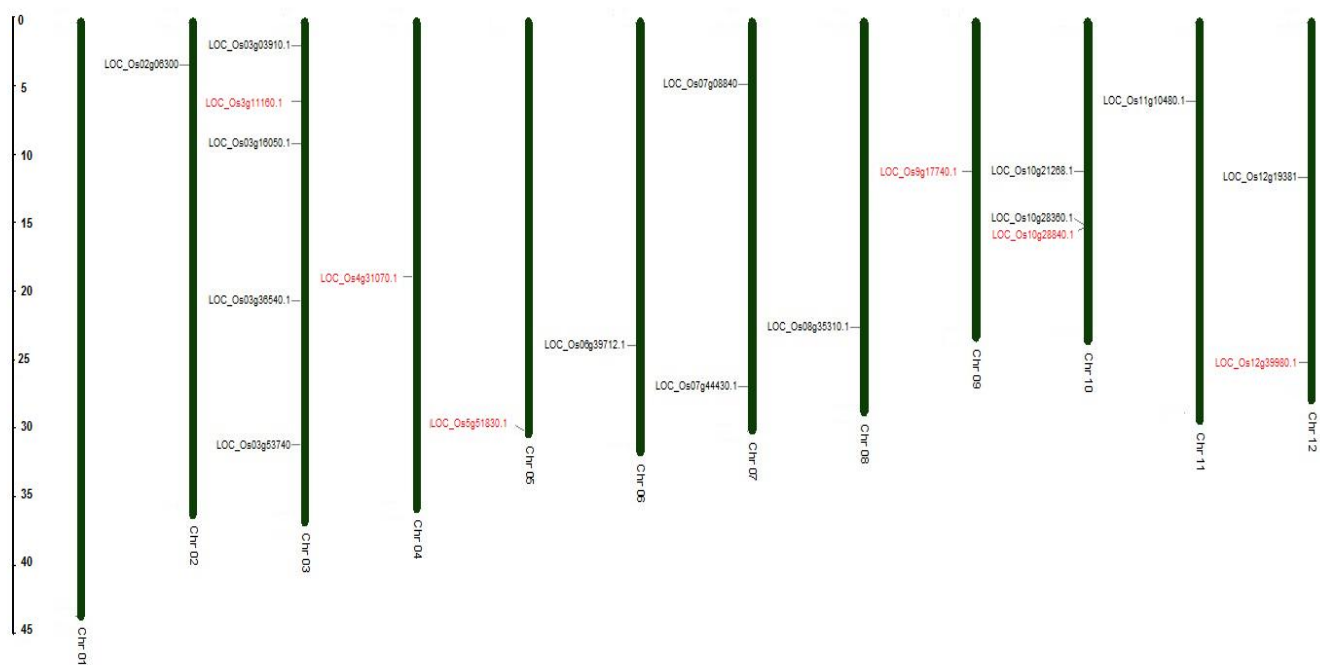

**Figure S1.** Chromosomal location of genes encoding differentially expressed proteins of cultivated rice cv. Pusa Basmati-1 (black colour) and wild rice accession *O. grandiglumis* (red colour). The Proteins were mapped to the rice genome according to the locus of the markers.

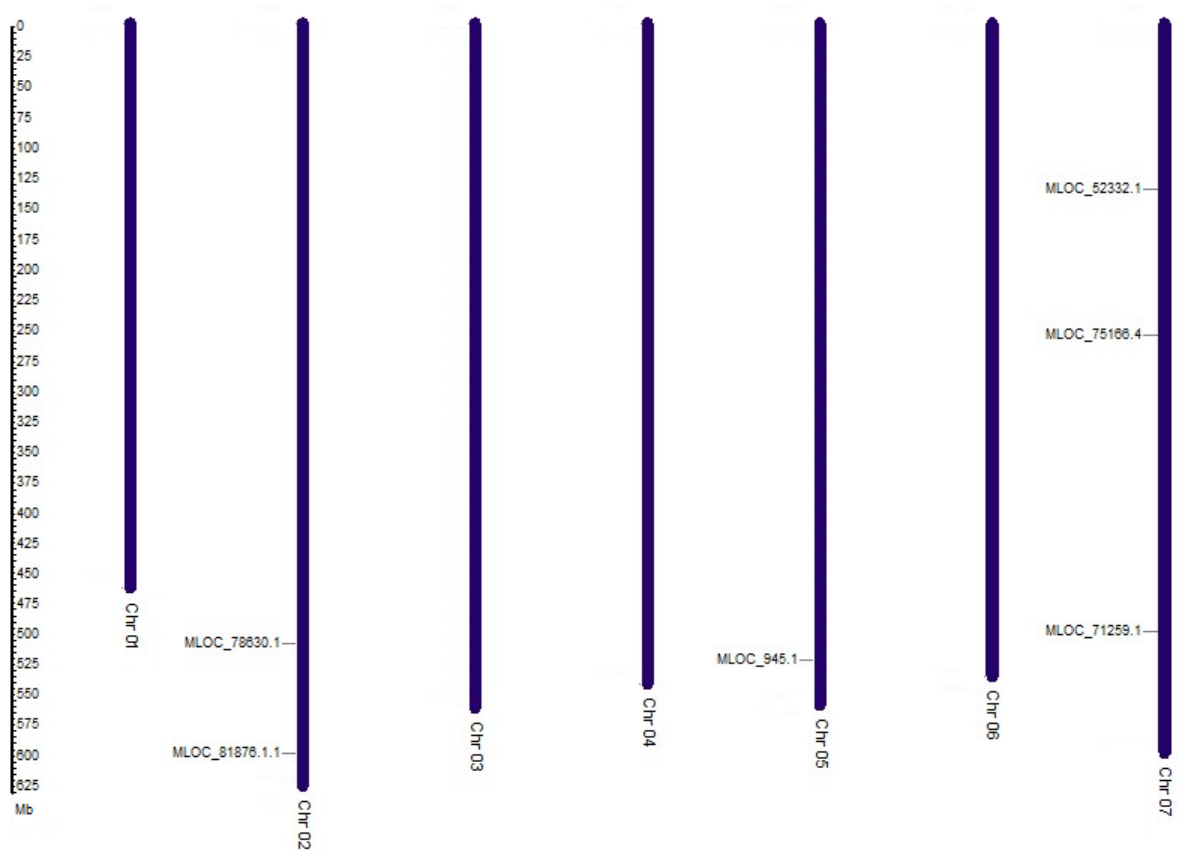

**Figure S2.** Chromosomal location of genes encoding differentially expressed proteins of barley cv. NDB-1445 . The proteins mapped to the barley genome according to the locus of the markers.
